# Supplementary material for: The Complete Mitogenome of Curculio Chinensis (Coleoptera: Curculionidae: Curculioninae): Structural Characterization and Phylogenetic Implication
Source: Research Square preprint supplement (doi:10.21203/rs.3.rs-505278/v1), 2021-05-17
Supplement: Supplementary file 1 [file 98b5c0318da2b4855b1086d2.docx]

**Table S6.** Base composition and skewness of mitogenome of *Anthonomus rubi*.

| Feature | Length | A+T% | AT-skew | GC-skew |
| --- | --- | --- | --- | --- |
| Whole genome | 17476 | 74.5 | 0.046 | -0.201 |
| PCGs | 11073 | 73.3 | -0.14 | -0.093 |
| tRNAs | 1447 | 76.5 | 0.023 | 0.088 |
| rRNAs | 1818 | 76.6 | -0.05 | 0.332 |
| Control region | 1389 | 78.4 | 0.014 | -0.293 |
