# Supplementary material for: The Complete Mitogenome of Curculio Chinensis (Coleoptera: Curculionidae: Curculioninae): Structural Characterization and Phylogenetic Implication
Source: Research Square preprint supplement (doi:10.21203/rs.3.rs-505278/v1), 2021-05-17
Supplement: Supplementary file 2 [file e65b2b35af3036f7b98135f7.docx]

**Table S9.** Base composition and skewness of mitogenome of *Elaeidobius kamerunicus*.

| Feature | Length | A+T% | AT-skew | GC-skew |
| --- | --- | --- | --- | --- |
| Whole genome | 17729 | 73.5 | 0.085 | -0.224 |
| PCGs | 11112 | 72.1 | -0.13 | -0.065 |
| tRNAs | 1458 | 77.1 | 0.02 | 0.108 |
| rRNAs | 2043 | 77.7 | -0.075 | 0.316 |
| Control region | 2588 | 75.8 | 0.102 | -0.329 |
